# Supplementary figures and images for: Enhanced bonding intensity between the vertically aligned carbon fiber thermal interface material and heat spreader of a flip-chip package through a silane coupling agent
Source: Royal Society of Chemistry journal article supplement (doi:10.1039/d5cp00204d), 2025-01-01

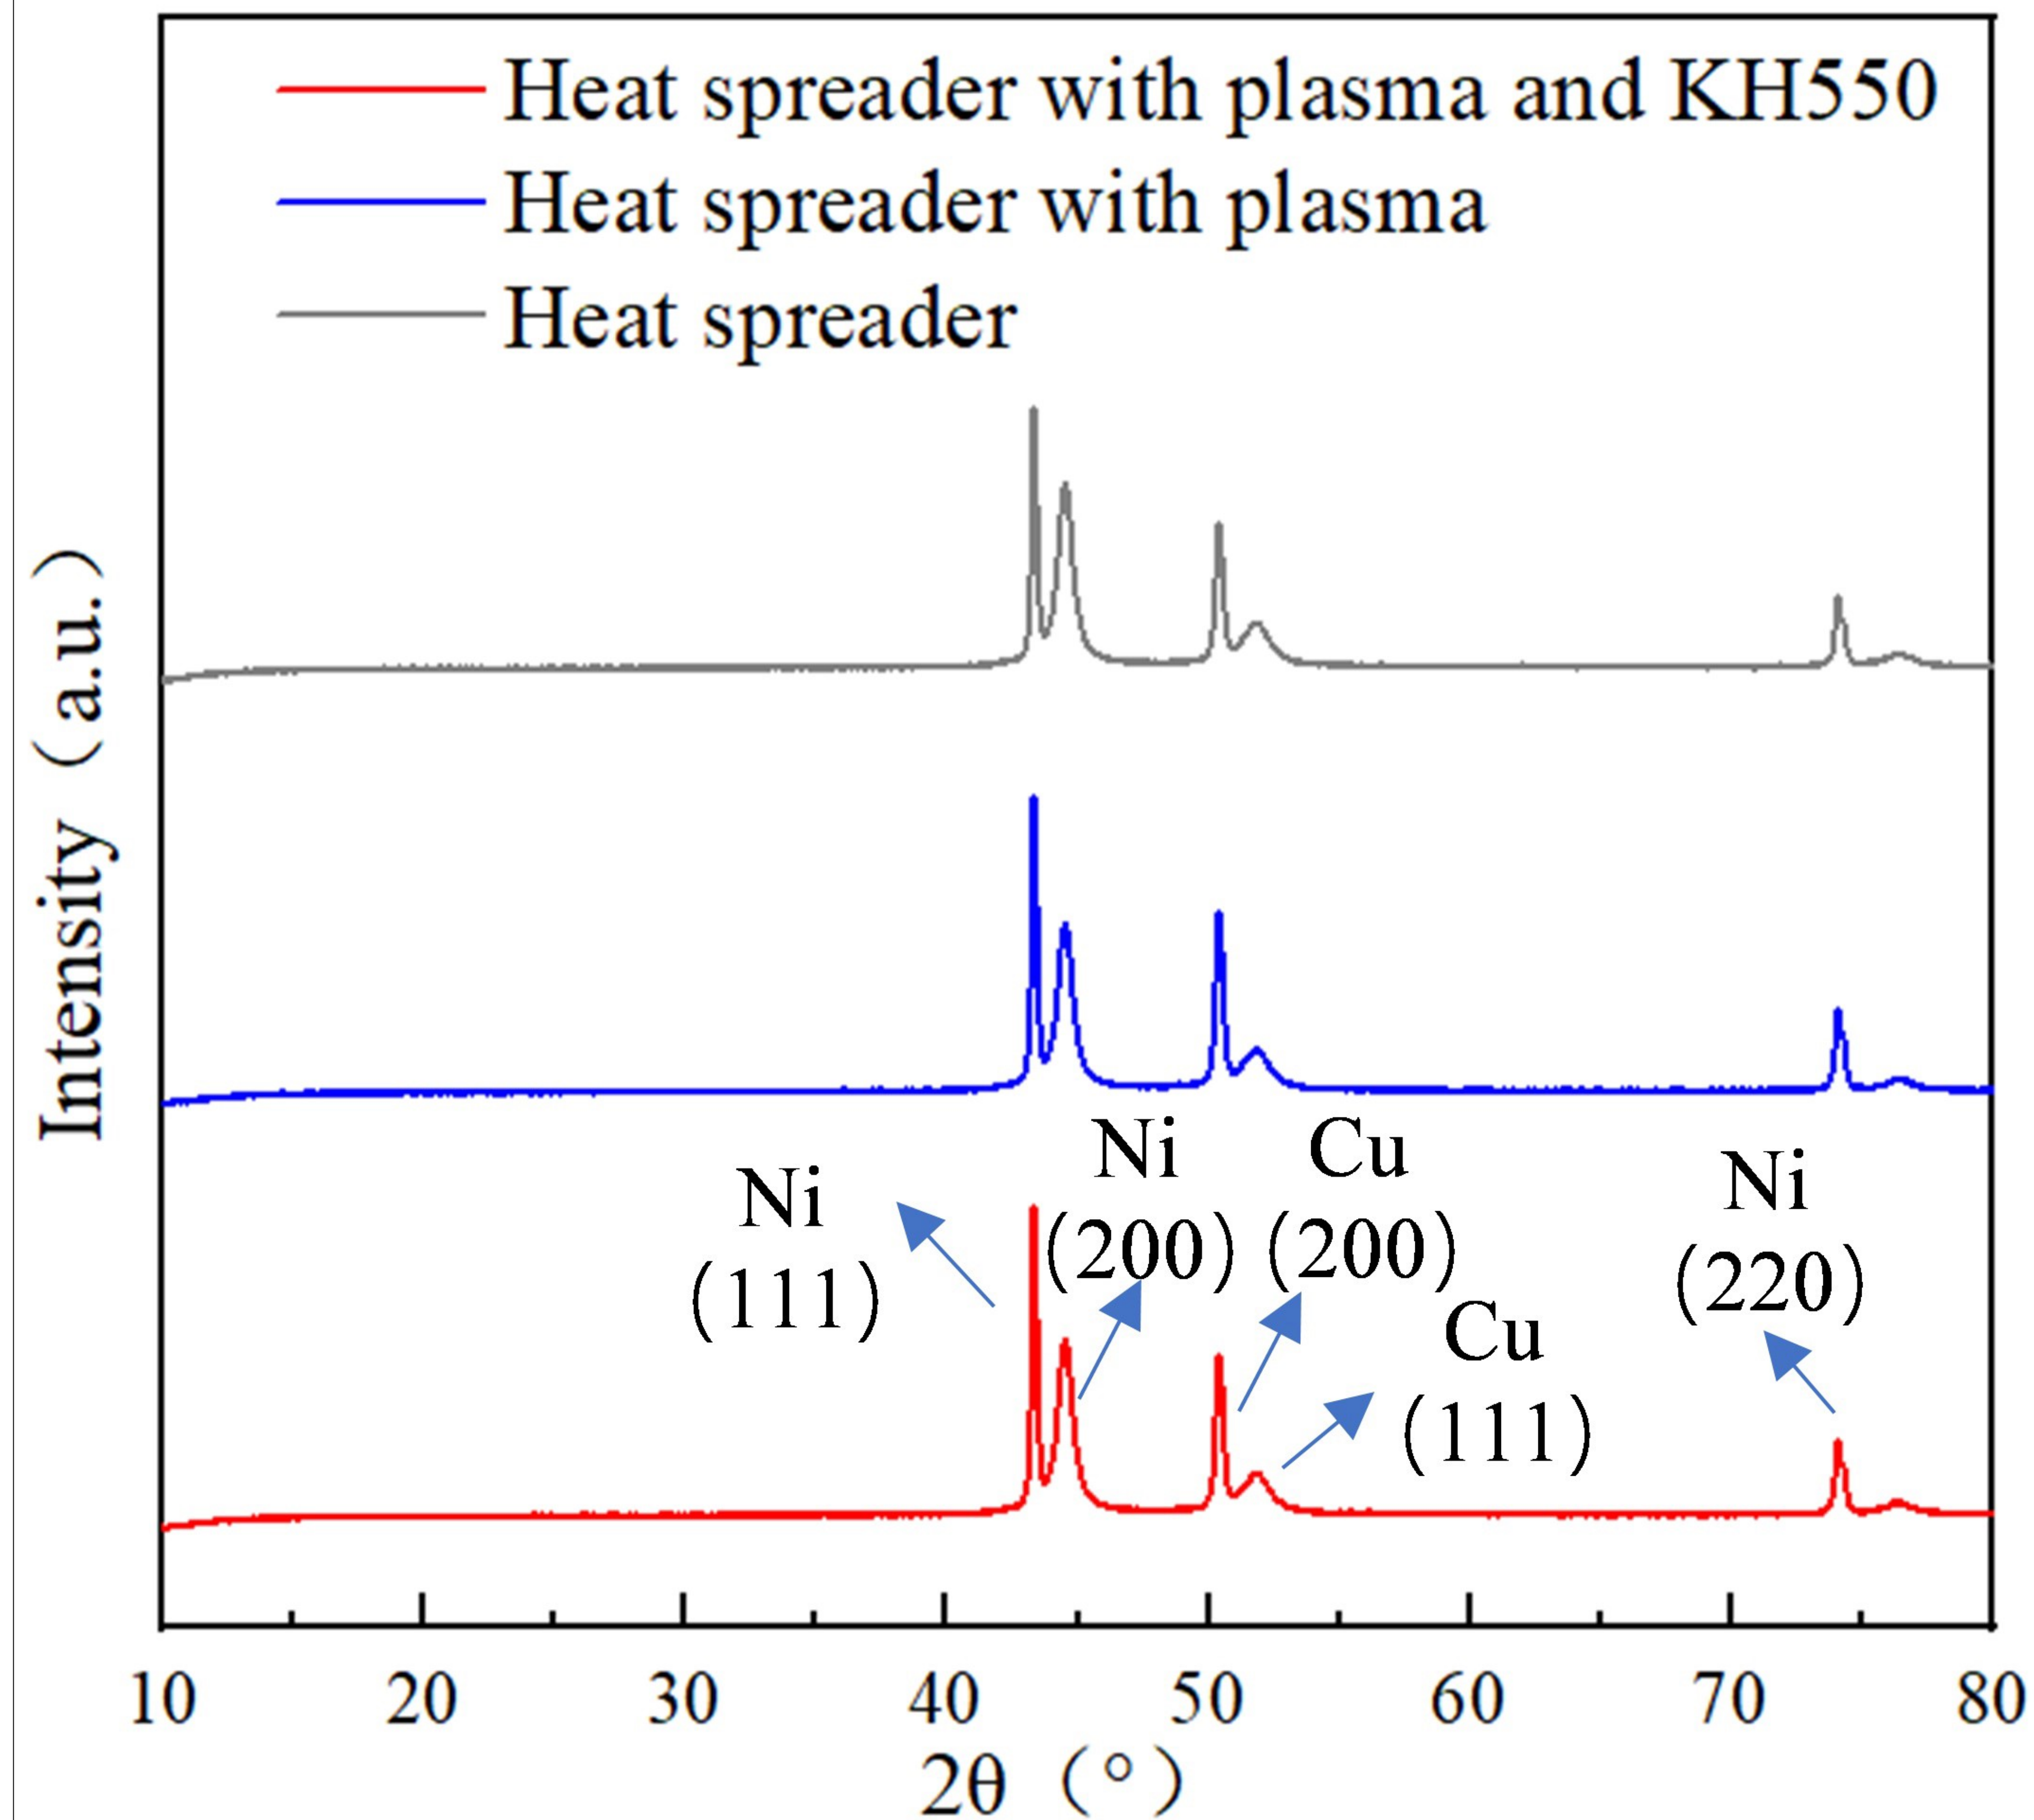

Supplement: d5cp00204d2.pdf [file d5cp00204d2.pdf]
